**Table 4. Table of Findings of Included Studies: SARS-CoV-2 and the Role of Orofecal Transmission: (n=59)**

| Main findings of Studies on orofecal transmission of SARS-CoV-2                                                                                                                                                                                                                                                                                                                                                      | Study (link to summary)             |
|----------------------------------------------------------------------------------------------------------------------------------------------------------------------------------------------------------------------------------------------------------------------------------------------------------------------------------------------------------------------------------------------------------------------|-------------------------------------|
| Using samples collected between February and April 2020 from sewage treatment plants in Queensland, Australia, SARS-CoV-2 was detected by RT-qPCR assay, confirmed by sequencing.                                                                                                                                                                                                                                    | <a href="#">Ahmed 2020</a>          |
| A descriptive review of 14 studies looking at fecal excretion of COVID-19 to 15th March 2020 found that COVID-19 may be transmitted oro-fecally, but the number of studies with findings of viable virions in the faeces is small, making this mode of transmission uncertain.                                                                                                                                       | <a href="#">Amirian 2020</a>        |
| Prolonged virus shedding is observed in the respiratory tract and feces of children at the convalescent stage.                                                                                                                                                                                                                                                                                                       | <a href="#">Cai 2020</a>            |
| A short review of available evidence of the orofecal transmission and its possible relation to wastewater management indicated that recreational water could have concentration of SARS-CoV-2 agent via faulty wastewater management.                                                                                                                                                                                | <a href="#">Cahill 2020</a>         |
| This very early study established the likelihood of person to person transmission of SARS-CoV-2, in hospital and family settings. The two faecal samples from patients 3 and 4 who had preceding diarrhoea were negative on a multiplex PCR assay for common diarrhoeal viruses, bacteria, and parasites.                                                                                                            | <a href="#">Chan 2020</a>           |
| Testing of 24-h composite raw sewage samples from two large wastewater treatment plants in Spain showed that SARS-CoV-2 was detected in sewage 41 days (15th January 2020) before the declaration of the first COVID-19 case (25th February 2020) in Spain, and in frozen samples dating back to 12th March 2019. If these results are confirmed, they suggest SARS CoV-2 has been around longer than first thought. | <a href="#">Chavarria-Miro 2020</a> |
| This retrospective study of 133 hospitalised COVID-19 patients identified 22 whose sputum or fecal samples tested positive, after their pharyngeal swabs became negative.                                                                                                                                                                                                                                            | <a href="#">Chen C 2020</a>         |
| SARs-CoV-2 RNA was readily detected in the blood (6/57 patients) and anal swabs (11/28 patients).                                                                                                                                                                                                                                                                                                                    | <a href="#">Chen W 2020</a>         |
| Sixty seven percent (28/42) laboratory-confirmed hospitalised COVID-19 patients tested positive for SARS-CoV-2 RNA in stool specimens; this was not associated with the presence of GI symptoms or severity of illness.                                                                                                                                                                                              | <a href="#">Chen Y 2020</a>         |

|                                                                                                                                                                                                                                                                                                                                                                                                                                                        |                               |
|--------------------------------------------------------------------------------------------------------------------------------------------------------------------------------------------------------------------------------------------------------------------------------------------------------------------------------------------------------------------------------------------------------------------------------------------------------|-------------------------------|
| Among them, 18 (64%) patients remained positive for viral RNA in the feces after the pharyngeal swabs turned negative, for a duration of 6 to 10 days.                                                                                                                                                                                                                                                                                                 |                               |
| This study analysed stool samples from a cohort of 59 patients with COVID-19 in Hong Kong during February 2020 and additionally did a meta-analysis of data from 11 studies on the prevalence of gastrointestinal symptoms and stool excretion of viruses. Fecal discharge continues long after respiratory shedding of COVID-19 has ceased.                                                                                                           | <a href="#">Cheung 2020</a>   |
| SARS-CoV-2 RNA was detected in at least one nasopharyngeal (NP) swab, 11/12 oropharyngeal (OP) swab and 7/10 in the stool in this case series describing the first 12 US patients confirmed to have COVID-19 from 20 January to 5 February 2020.                                                                                                                                                                                                       | <a href="#">COVID Ix Team</a> |
| This study reviewed literature on the potential of SARS-CoV-2 to infect the human gastrointestinal tract, and shed via the fecal route to generate orofecal transmission. Various observational and mechanistic evidence supports that SARS-CoV-2 can infect and be shed from the human gastrointestinal tract.                                                                                                                                        | <a href="#">Ding S 2020</a>   |
| This study randomly sampled in rooms and areas in the COVID-19 designated infectious diseases hospital Nanjing, China. 4/107 surface samples tested positive: two ward door door-handles, one bathroom toilet toilet-seat cover and one bathroom door door-handle. Three were weakly positive from a bathroom toilet seat, one bathroom washbasin tap lever and one bathroom ceiling exhaust louvre. 1/46 corridor air samples tested weakly positive. | <a href="#">Ding Z 2020</a>   |
| This short review reported that in children, the orofecal route is an alternative route of transmission, regardless of presenting COVID 19 symptomatology. Exclusion of SARS-CoV-2 infection by single time point nasopharyngeal swabs should not be used in children.                                                                                                                                                                                 | <a href="#">Dona 2020</a>     |
| This review of 26 studies reported that there is a high rate of PCR positive persistence of SARS-CoV-2 in faecal samples of patients with COVID-19.                                                                                                                                                                                                                                                                                                    | <a href="#">Gupta 2020</a>    |
| Among a group of hospitalised patients with low severity COVID-19, digestive symptoms were present in 57%. Patients with digestive symptoms were more likely to be fecal virus-positive than those with respiratory symptoms.                                                                                                                                                                                                                          | <a href="#">Han C 2020</a>    |
| Stool obtained in a single case report was positive for SARs-CO-V-2 on day 7 of the illness.                                                                                                                                                                                                                                                                                                                                                           | <a href="#">Holshue 2020</a>  |
| There was viable SARS-CoV-2 in saliva, urine, and stool from COVID-19 patients up until days 11 to 15 of the clinical course suggesting that viable                                                                                                                                                                                                                                                                                                    | <a href="#">Jeong 2020</a>    |

|                                                                                                                                                                                                                                                                                                                    |                                |
|--------------------------------------------------------------------------------------------------------------------------------------------------------------------------------------------------------------------------------------------------------------------------------------------------------------------|--------------------------------|
| SARS-CoV-2 can be secreted in various clinical samples as well as respiratory specimens.                                                                                                                                                                                                                           |                                |
| SARS-CoV-2 RNA was detected in serum, urine or stool samples in 20% of patients hospitalised with COVID-19. However, the virus could not be isolated from these samples and therefore the risk of transmission via these media is not established.                                                                 | <a href="#">Kim J-M 2020</a>   |
| This systematic review concluded that extensive uncertainty on the ecology of SARS-CoV-2 makes it hard to make specific recommendations on handling and prevention of transmission. CoV are susceptible to heat, surfactants and low pH.                                                                           | <a href="#">Kingsbury 2020</a> |
| Laboratory based study found that SARS-CoV-2 infects enterocyte lineage cells in a human intestinal organoid model.                                                                                                                                                                                                | <a href="#">Lamers 2020</a>    |
| This systematic review showed that Coroviridae have been isolated in different types of liquids from waste to surface water, but in general, they appear to be unstable. Chlorination and higher temperatures lead to their inactivation.                                                                          | <a href="#">La Rosa 2020</a>   |
| An environmental surveillance study based on twelve influent sewage samples, collected between February and April 2020 from wastewater treatment plants in Milan and Rome, Italy showed SARS-CoV-2 RNA fragments have been identified in sewage in Italy, and suggest a novel RT-PCR test for screening of waters. | <a href="#">La Rosa 2020a</a>  |
| SARS-CoV-2 viral RNA was detected in the stools of two women out of the case series of five patients                                                                                                                                                                                                               | <a href="#">Lescure 2020</a>   |
| From 292 confirmed cases with COVID-19 in the Shanghai region, 66 recovered patients were included Clearance of viral RNA in patients' stools was delayed compared to oropharyngeal swabs.                                                                                                                         | <a href="#">Ling 2020</a>      |
| A report of the clinical and microbiological features of ten COVID-19 patients in the Centro Hospitalar Conde de São Januário between January 21st to February 16th, 2020. found that SARS-CoV-2 can be shed in the stool and the assessment of both fecal and respiratory specimen is recommended                 | <a href="#">Lo 2020</a>        |
| SARS-CoV-2 was detected in the sewage of five sites a week after the first COVID-19 case in the Netherlands. Even at low COVID-19 prevalence sewage surveillance could be a sensitive tool to monitor the viral circulation.                                                                                       | <a href="#">Medema 2020</a>    |
| The study ran from 24th January to 4th February 2020 and involved sampling in the physical areas around three COVID-19 patients at the Singapore dedicated SARS-CoV-2 outbreak center. The toilet bowl (seat                                                                                                       | <a href="#">Ong 2020</a>       |

|                                                                                                                                                                                                                                                                                                                                                                       |                               |
|-----------------------------------------------------------------------------------------------------------------------------------------------------------------------------------------------------------------------------------------------------------------------------------------------------------------------------------------------------------------------|-------------------------------|
| and inner surface) and sink samples were positive, suggesting that viral shedding in stool could be a potential route of transmission. Post-cleaning samples were negative, suggesting that current decontamination measures were sufficient.                                                                                                                         |                               |
| SARS-CoV-2 RNA was positive in stools, nasopharyngeal and oropharyngeal swabs at different time points in a case report.                                                                                                                                                                                                                                              | <a href="#">Nicastri 2020</a> |
| Stool samples from 9/17 confirmed patients (53%) were positive on RT-PCR analysis.                                                                                                                                                                                                                                                                                    | <a href="#">Pan 2020</a>      |
| This review reports that the gastrointestinal tract supports the growth of SARS-CoV-2 to an extent similar to previous SARS infections and that gastric symptoms are frequently experienced in COVID-19.                                                                                                                                                              | <a href="#">Parasa 2020</a>   |
| Virus was found in urine, blood and in two anal swabs and oropharyngeal swabs of nine patients diagnosed with COVID-19.                                                                                                                                                                                                                                               | <a href="#">Peng 2020</a>     |
| SARS-CoV-2 was detected in the rectum of a COVID-19 patient during the incubation period. There was direct evidence of replication of SARS-CoV-2 in the intestine.                                                                                                                                                                                                    | <a href="#">Qian 2020</a>     |
| A systematic review of 4 case series including 36 children with mild COVID-19 found that fecal shedding in children with COVID-19 occurs on average nine days longer than by the respiratory route.                                                                                                                                                                   | <a href="#">Santos 2020</a>   |
| This pilot study in India found SARS-CoV-2 RNA in fecal samples from 12 symptomatic and asymptomatic COVID-19 patients.                                                                                                                                                                                                                                               | <a href="#">Senapati 2020</a> |
| Combining in vitro data, pollution analysis and a virus survivability model, based on data from 39 countries, SARS-CoV-2 can remain stable within water for up to 25 days. Country-specific risk of infection posed by faecal contaminated water is environment-dependent, with water flow and temperature as important variables.                                    | <a href="#">Shutler 2020</a>  |
| In a single case report, SARS-CoV-2 was detected in the throat and rectum of the patient with COVID-19.                                                                                                                                                                                                                                                               | <a href="#">Tan 2020</a>      |
| An asymptomatic child was positive for a coronavirus by reverse transcription PCR in a stool specimen 17 days after the last virus exposure.                                                                                                                                                                                                                          | <a href="#">Tang 2020</a>     |
| Reviewed GI features of, and faecal test results in, COVID-19 from case reports and retrospective clinical studies: Gastrointestinal symptoms are common in COVID-19 patients and were observed with increased prevalence as the epidemic progressed in China. SARS-CoV-2 enters GI epithelial cells, and the faeces of COVID-19 patients are potentially infectious. | <a href="#">Tian 2020</a>     |

|                                                                                                                                                                                                                                                                                                                                                                                                                                                                                                                                       |                                     |
|---------------------------------------------------------------------------------------------------------------------------------------------------------------------------------------------------------------------------------------------------------------------------------------------------------------------------------------------------------------------------------------------------------------------------------------------------------------------------------------------------------------------------------------|-------------------------------------|
| <p>The study reports the presence of SARS-Cov-2 in the hospital environment, surfaces, sewage, and the staff PPE in isolation wards in the First Affiliated Hospital of Zhejiang University in China. SARS-Cov-2 RNA were positive from inlets of the sewage disinfection pool and negative from the outlet of the last sewage disinfection pool but no viable virus was detected by culture.</p>                                                                                                                                     | <p><a href="#">Wang J 2020b</a></p> |
| <p>In this case series from China, 2 stool specimens out of 44 positives contained live virus, suggesting that orofecal transmission is possible. Transmission of the virus by respiratory and extra respiratory routes may help explain the rapid spread of disease.</p>                                                                                                                                                                                                                                                             | <p><a href="#">Wang W 2020</a></p>  |
| <p>No live SARS-CoV was found in any sewage samples from two hospitals receiving COVID-19 patients. SARS-CoV RNA was detected in sewage concentrates of two hospitals receiving SARS patients prior to disinfection, and occasionally after disinfection.</p>                                                                                                                                                                                                                                                                         | <p><a href="#">Wang XW 2020</a></p> |
| <p>In three cases intestine SARS-CoV-2 infection affected the disease course of COVID-19 and the digestive system was the main target organ of SARS-CoV-2 in some patients.</p>                                                                                                                                                                                                                                                                                                                                                       | <p><a href="#">Wang X 2020b</a></p> |
| <p>Nine cases of COVID-19 that provide proof of active virus replication in tissues of the upper respiratory tract. Stool samples were also positive but none grew live virus.</p>                                                                                                                                                                                                                                                                                                                                                    | <p><a href="#">Wölfel 2020</a></p>  |
| <p>In 98 hospitalized COVID-19 cases, patients' faecal samples remained positive for SARS-CoV-2 for a mean of 11 days (maximum 5 weeks) after respiratory tract samples became negative.</p>                                                                                                                                                                                                                                                                                                                                          | <p><a href="#">Wu Y 2020</a></p>    |
| <p>An increase of SARS-CoV-2 genome units in raw wastewaters in and around Paris, France accurately followed the increase of human COVID-19 cases observed at the regional level.</p>                                                                                                                                                                                                                                                                                                                                                 | <p><a href="#">Wurtzer 2020</a></p> |
| <p>Assessing viral RNA in feces from 71 patients with SARS-CoV-2 infection during their hospitalizations, and examining the viral RNA and viral nucleocapsid protein in gastrointestinal tissues from one of the patients, suggests SARS-CoV-2 may both infect the gastrointestinal system and transmit via an orofecal route.<br/>Detection of some viral nucleocapsid protein in rectal epithelial cells of COVID-19 patients suggests that some infectious viral particles may survive the harsh gastrointestinal environment.</p> | <p><a href="#">Xiao 2020</a></p>    |
| <p>This case series of 28 hospitalised patients for whom faeces samples were available indicated that infectious virus was present in faeces from two cases who also tested positive for viral RNA by RT-PCR.</p>                                                                                                                                                                                                                                                                                                                     | <p><a href="#">Xiao 2020b</a></p>   |
| <p>Three children showed a prolonged presence of SARS-CoV-2 in feces after throat swabs were negative.</p>                                                                                                                                                                                                                                                                                                                                                                                                                            | <p><a href="#">Xing Y 2020</a></p>  |

|                                                                                                                                                                                                                                                                                                                  |                              |
|------------------------------------------------------------------------------------------------------------------------------------------------------------------------------------------------------------------------------------------------------------------------------------------------------------------|------------------------------|
| This study of 10 children with COVID-19 found that symptoms among children were nonspecific and relatively mild; rectal swabs tested positive among 8/10 cases even once nasopharyngeal tests became negative.                                                                                                   | <a href="#">Xu Y 2020</a>    |
| Viable viral isolates were extracted from sputum (n=7), stool samples (n=3) and one nasopharyngeal sample indicating that the SARS-CoV-2 is capable of replicating in stool samples                                                                                                                              | <a href="#">Yoa H 2020</a>   |
| SARS-CoV-2 Virus was detectable in the stool of 4 of 8 hospitalized patients.                                                                                                                                                                                                                                    | <a href="#">Young 2020</a>   |
| A retrospective case note survey of 2,138 paediatric patients with suspected SARS-CoV-2 infection in Wuhan Children's Hospital from January to March 2020 suggested that in some children, fecal shedding may be a sign of prolonged mildly asymptomatic infection and represent the final phase of the disease. | <a href="#">Yuan 2020</a>    |
| This laboratory study showed that human enterocytes expressing high ACE2 receptor levels could support infection with SARS-CoV-2. However, the virus is rapidly inactivated in the GI tract, and no infectious virus was obtained from stool samples from COVID-19 patients.                                     | <a href="#">Zang 2020</a>    |
| A small pilot sample of 14 cases indicated agreement for the presence of COVID-19 between oropharyngeal samples and fecal samples.                                                                                                                                                                               | <a href="#">Zhang J 2020</a> |
| Three children with mild symptoms who were SARS-CoV-2 throat swab specimen negative on discharge from hospital were stool positive 10 days post-discharge.                                                                                                                                                       | <a href="#">Zhang T 2020</a> |
| A small study of hospitalised COVID-19 patients indicated that RNA of SARS-CoV-2 may be shed via multiple bodily routes, and highlights that COVID-19 is found in anal swabs sometimes when oral swabs show no viral RNA.                                                                                        | <a href="#">Zhang W 2020</a> |
| Live virus has been isolated from the stools of one severe pneumonia case, pointing to a possible oro-fecal spread.                                                                                                                                                                                              | <a href="#">Zhang Y 2020</a> |
| This laboratory study showed that SARS-CoV-2 can infect bat intestinal cells, and demonstrated SARS-CoV-2 replication in human intestinal organoids, suggesting that the human intestinal tract might be a transmission route of SARS-CoV-2.                                                                     | <a href="#">Zhou J 2020</a>  |
